# Supplementary material
Source: Springer Nature journal article supplement (https://www.springermedizin.de/resource/supplementary/12958_2012_1058_MOESM5_ESM.pdf/9566854)

**A***ISG15*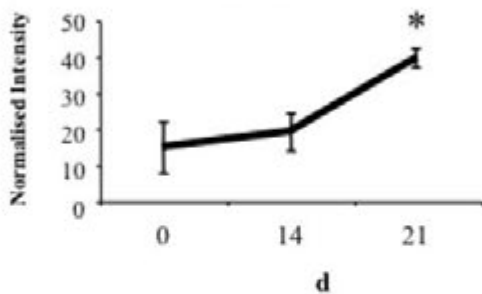*MX1*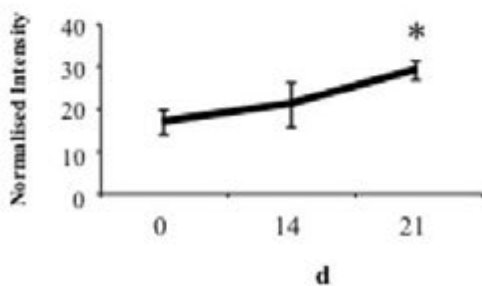*MX2*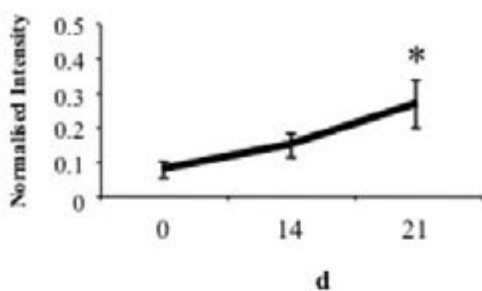*OAS1*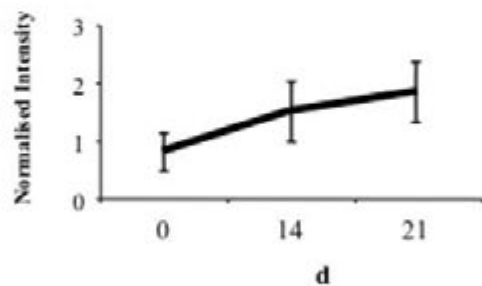**B***ISG15*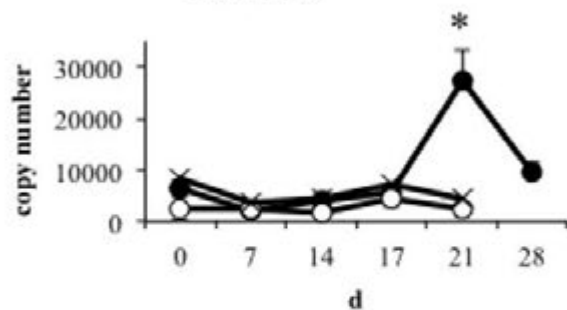*MX1*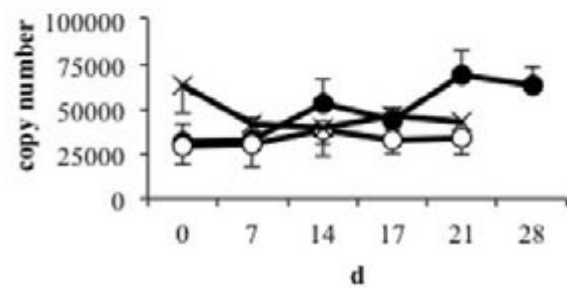*MX2*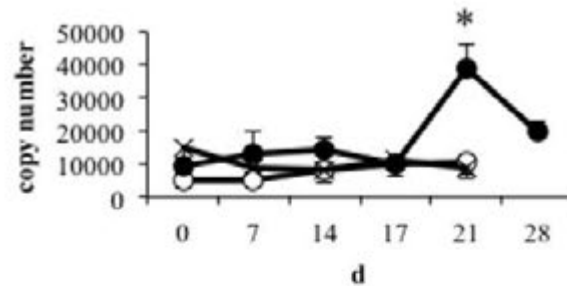*OAS1*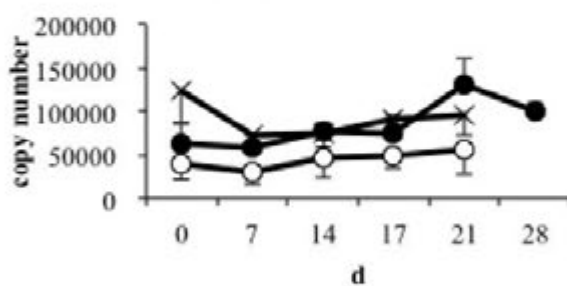

Supplement: MOESM5 [file 9566854]
